# Supplementary material for: Chemical Composition and Biological Properties of New Romanian Lavandula Species
Source: MDPI journal article supplement (doi:10.3390/antiox12122127), 2023-12-16
Supplement: s1 [file s1]

# Chemical Composition and Biological Properties of New Romanian *Lavandula* species

Ionuț Georgică Marchidan <sup>1</sup>, Alina Ortan <sup>2,\*</sup>, Simona Marcu Spinu <sup>2</sup>, Sorin Marius Avramescu <sup>3</sup>, Ionela Avram <sup>4,\*</sup>, Radu Claudiu Fierascu <sup>5</sup> and Narcisa Babeanu <sup>1</sup>

<sup>1</sup> Biotechnologies Department, Faculty of Biotechnologies, University of Agronomic Sciences and Veterinary Medicine of Bucharest, 59 Marasti Blvd, District 1, 011464 Bucharest, Romania; ionut.marchidan@biotehnologii.usamv.ro (I.G.M.); narcisa.babeanu@biotehnologii.usamv.ro (N.B.)

<sup>2</sup> Mathematics, Physics and Measurements Department, Faculty of Land Reclamation and Environmental Engineering, University of Agronomic Sciences and Veterinary Medicine of Bucharest, 59 Marasti Blvd, District 1, 011464 Bucharest, Romania; simona.spinu@fifim.ro (S.M.S.)

<sup>3</sup> Department of Inorganic Chemistry, Organic Chemistry, Biochemistry and Catalysis, Faculty of Chemistry, University of Bucharest, 90–92 Soseaua Panduri, 050663 Bucharest, Romania; sorin.avramescu@g.unibuc.ro

<sup>4</sup> Department of Genetics, University of Bucharest, 1-3-Aleea Portocalelor, 060101 Bucharest, Romania

<sup>5</sup> National Institute for Research & Development in Chemistry and Petrochemistry-ICECHIM–Bucharest, 060021 Bucharest, Romania; fierascu.radu@icechim.ro

\* Correspondence: alina.ortan@fifim.ro (A.O.); ionela.avram@unibuc.ro (I.A.)

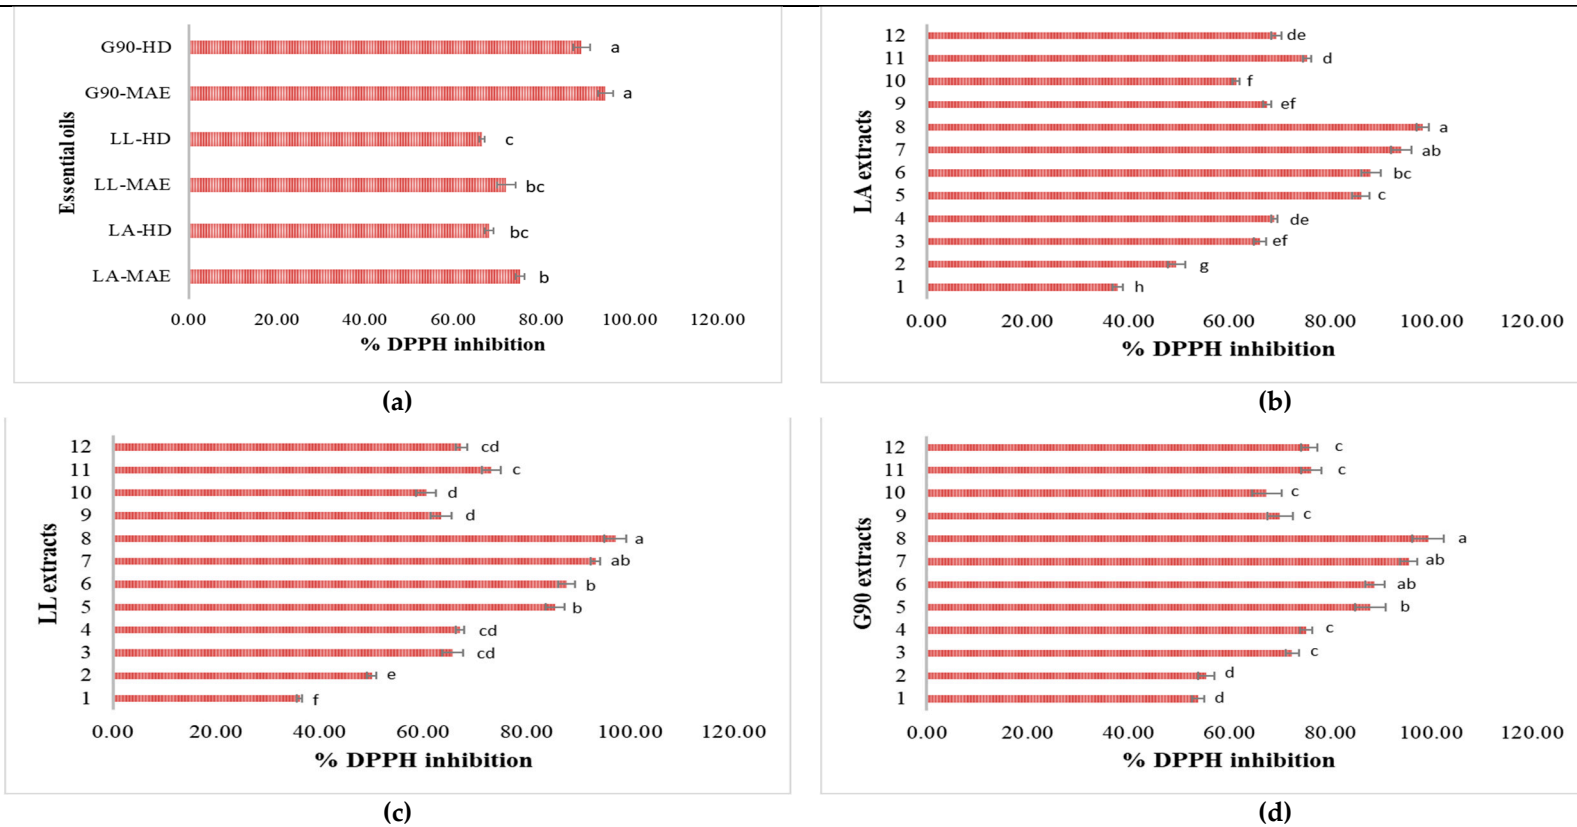

**Figure S1.** DPPH antioxidant potential expressed as inhibition percent of (a) LA, LL and G90 essential oils and (b) LA, (c) LL and (d) G90 hydroalcoholic extracts. LA-MAE - *L. angustigolia* MAE essential oil, LA-HD - *L. angustigolia* HD essential oil, LL-MAE - *L. latifolia* MAE essential oil, LL-HD - *L. latifolia* HD essential oil, G90-MAE - *George 90* MAE essential oil and G90-HD - *George 90* HD essential oil. 1 – EtOH 50%, plant material/solvent ratio at 1:20 (m/v), G1 coarse-sized plant material; 2 – EtOH 50%, plant material/solvent ratio at 1:20 (m/v), G2 fine-sized plant material; 3 – EtOH 50%, plant material/solvent ratio at 1:40 (m/v), G1 coarse-sized plant material; 4 – EtOH 50%, plant material/solvent ratio at 1:40 (m/v), G2 fine-sized plant material; 5 – EtOH 70%, plant material/solvent ratio at 1:20 (m/v), G1 coarse-sized plant material; 6 – EtOH 70%, plant material/solvent ratio at 1:20 (m/v), G2 fine-sized plant material; 7 – EtOH 70%, plant material/solvent ratio at 1:40 (m/v), G1 coarse-sized plant material; 8 – EtOH 70%, plant material/solvent ratio at 1:40 (m/v), G2 fine-sized plant material; 9 – MeOH 50%, plant material/solvent ratio at 1:20 (m/v), G1 coarse-sized plant material; 10 – MeOH 50%, plant material/solvent ratio at 1:20 (m/v), G2 fine-sized plant material; 11 – MeOH 50%, plant material/solvent ratio at 1:40 (m/v), G1 coarse-sized plant material; 12 – MeOH 50%, plant material/solvent ratio at 1:40 (m/v), G2 fine-sized plant material. Values are presented as means  $\pm$  SD,  $n = 3$  per treatment group. Data without a common superscript letter differ ( $P < 0.05$ ) as analyzed by one-way ANOVA and the TUKEY test.

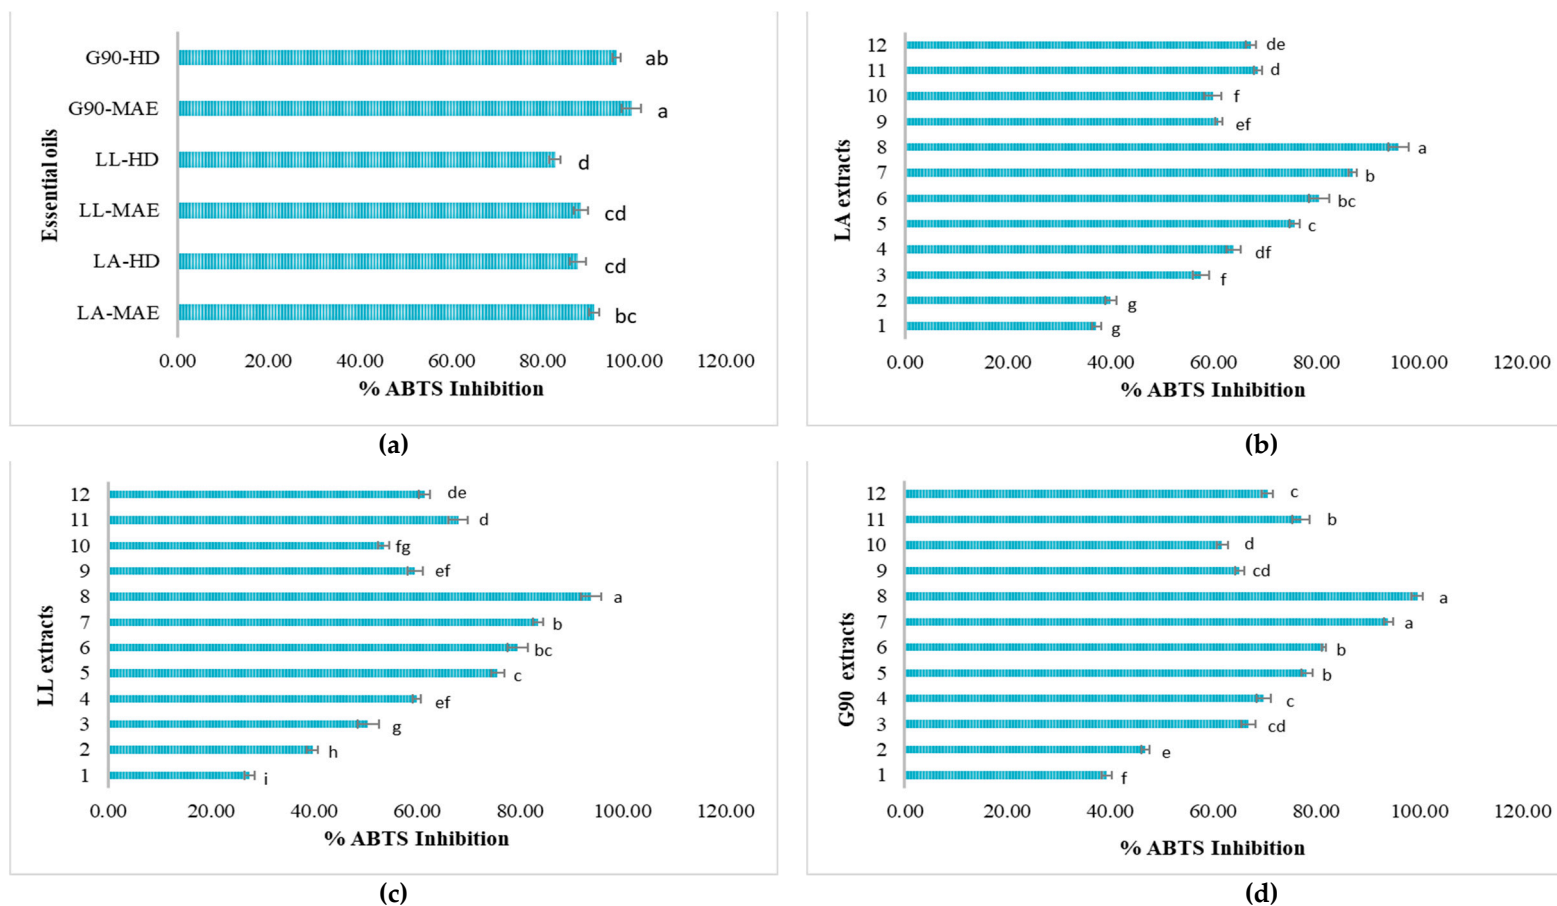

**Figure S2.** ABTS antioxidant potential expressed as inhibition percent of (a) LA, LL and G90 essential oils and (b) LA, (c) LL and (d) G90 hydroalcoholic extracts. LA-MAE - *L. angustigolia* MAE essential oil, LA-HD - *L. angustigolia* HD essential oil, LL-MAE - *L. latifolia* MAE essential oil, LL-HD - *L. latifolia* HD essential oil, G90-MAE - *George 90* MAE essential oil and G90-HD - *George 90* HD essential oil. 1 – EtOH 50%, plant material/solvent ratio at 1:20 (m/v), G1 coarse-sized plant material; 2 – EtOH 50%, plant material/solvent ratio at 1:20 (m/v), G2 fine-sized plant material; 3 – EtOH 50%, plant material/solvent ratio at 1:40 (m/v), G1 coarse-sized plant material; 4 – EtOH 50%, plant material/solvent ratio at 1:40 (m/v), G2 fine-sized plant material; 5 – EtOH 70%, plant material/solvent ratio at 1:20 (m/v), G1 coarse-sized plant material; 6 – EtOH 70%, plant material/solvent ratio at 1:20 (m/v), G2 fine-sized plant material; 7 – EtOH 70%, plant material/solvent ratio at 1:40 (m/v), G1 coarse-sized plant material; 8 – EtOH 70%, plant material/solvent ratio at 1:40 (m/v), G2 fine-sized plant material; 9 – MeOH 50%, plant material/solvent ratio at 1:20 (m/v), G1 coarse-sized plant material; 10 – MeOH 50%, plant material/solvent ratio at 1:20 (m/v), G2 fine-sized plant material; 11 – MeOH 50%, plant material/solvent ratio at 1:40 (m/v), G1 coarse-sized plant material; 12 – MeOH 50%, plant material/solvent ratio at 1:40 (m/v), G2 fine-sized plant material. Values are presented as means  $\pm$  SD,  $n = 3$  per treatment group. Data without a common superscript letter differ ( $P < 0.05$ ) as analyzed by one-way ANOVA and the TUKEY test.

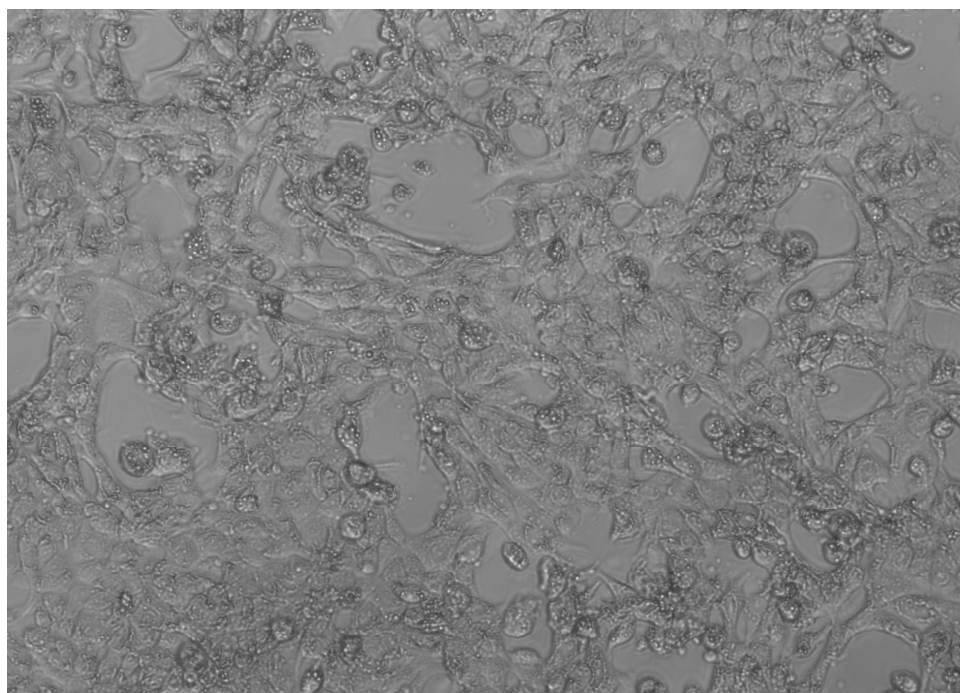

(a)

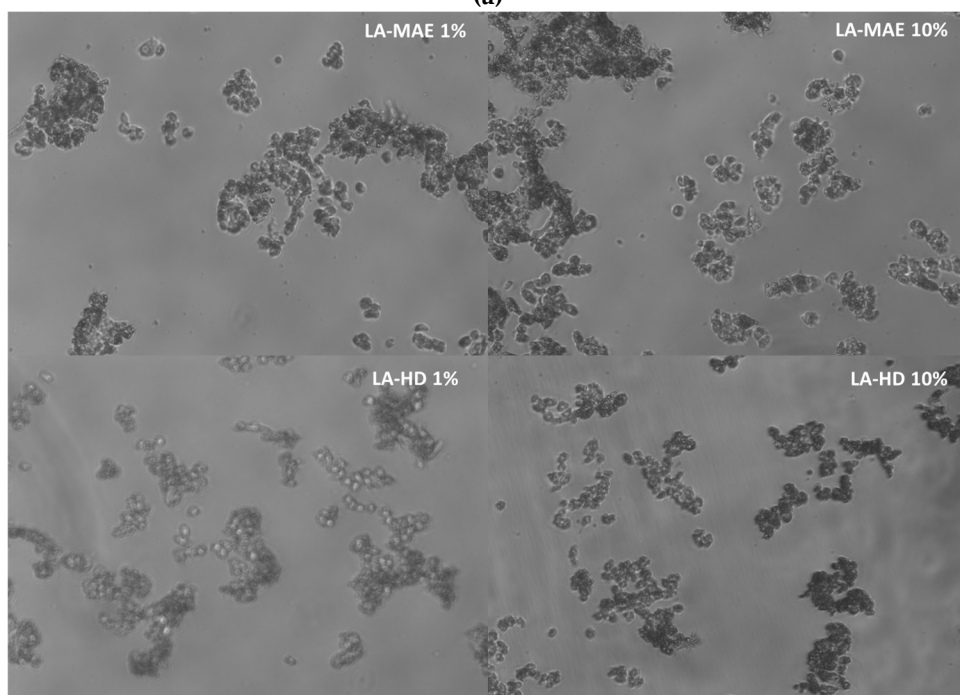

(b)

---



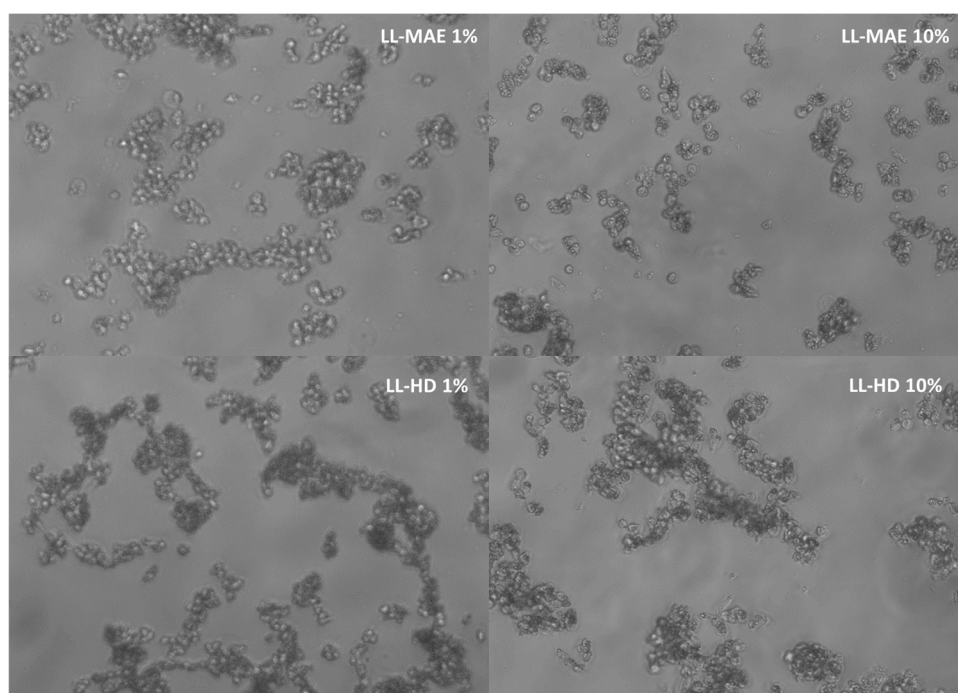

(c)

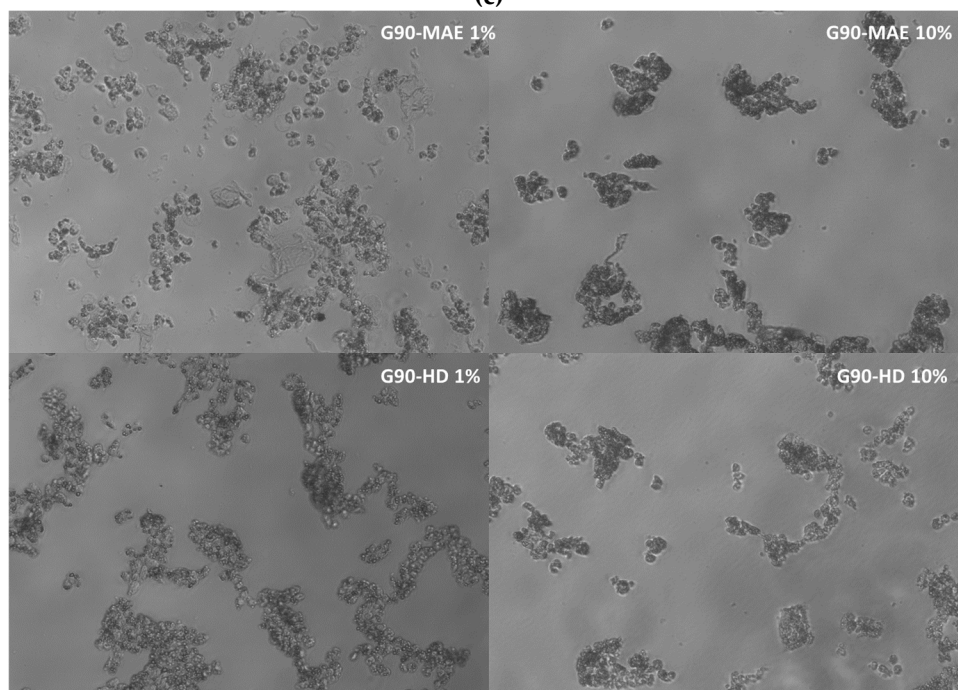

(d)

**Figure S3.** Cell morphological changes induced by the (a) negative control, (b) LA, (c) LL and (d) G90 essential oils.
